# Supplementary material
Source: PubMed Central journal article supplement (PMC3189048)
Supplement: 1113573108_pnas.201113573SI.pdf [file 1113573108_pnas.201113573SI.pdf]

# Supporting Information

Lee et al. 10.1073/pnas.1113573108

## SI Materials and Methods

**Fly Stocks from the Bloomington Stock Center.** The UAS-*MJD-78Q*, UAS-*MJD-27Q*, UAS-*p35*, UAS-*actin-GFP*, UAS-*Rac1*, UAS-*Rac1-V12*, UAS-*Spir-GFP*, UAS-*Cappuccino-GFP*, UAS-*Rho1-GFP*, UAS-*Enabled*, UAS-*Rac2*, UAS-*myr-PAK*, UAS-*HA-LIMK1*, UAS-*Cofilin*, UAS-*Rho-V20*, UAS-*HSP-A1L*, UAS-*Lamin-GFP*, UAS-*Red-Stinger*, and *D42-Gal4* fly lines were obtained from the Bloomington Stock Center.

**Specific Expression of Pathogenic PolyQ Proteins in da Neurons.** Severity and penetrance of polyQ-induced dendrite phenotypes in da neurons could be affected by use of different gal4 drivers. Thus, for consistency of the results, we used in all our experiments isogenized *ppk-gal4*, *221-gal4*, and *109(2)80-gal4* drivers to induce pathogenic polyQ protein expression in class IV, class I, and dorsal cluster da neurons, respectively. When pathogenic SCA3 or SCA1 protein expression was induced in dorsal cluster da neurons by *109(2)80-gal4* driver, partial and variable range of reduction of spine formation was observed in ddaA class III da neurons. RU486-inducible gene-switch experiments were done as previously described (1).

For genetic interaction study using *MJD-78Q<sup>weak</sup>* transgene, we generated a fly line carrying isogenized UAS-*MJD-78Q<sup>weak</sup>*, *ppk-gal4* driver, and UAS-*mCD8-GFP*. When we crossed this line to *w<sup>1118</sup>* wild-type fly, progenies showed dendrite phenotypes in ~80% of ddaC class IV da neurons at 25 °C (Fig. S1).

**Live Imaging of Dendrite Morphologies.** Live imaging was carried out using a Leica SP5 confocal system. More than five animals of the same genotype were examined, and images of dendrites of da neurons (ddaC class IV da neurons or dorsal cluster da neurons) in abdominal segments A2–A6 were taken. In all images, anterior is to the left and dorsal is up. Images were taken 120 h AEL

unless specified. Because expressing pathogenic polyQ proteins except for *MJD-78Q<sup>weak</sup>* tends to reduce the signal intensity of dendritic markers (mCD8-GFP and mRFP) in da neurons, we used about 30% higher detector gain for imaging dendrites of da neurons expressing these transgenes.

**Sholl Analysis of Dendritic Arbors of Class IV da Neurons.** Concentric circles with 10- $\mu$ m increments were drawn around the soma, and the number of dendritic branches that intersected each circle was counted. In neurons expressing *MJD-27Q* and *MJD-78Q*, the number of branches increased progressively from proximal to distal, and the largest number of dendrite branches was found between 200 and 300  $\mu$ m from the cell body. The number of intersections (the complexity of dendritic trees) was markedly reduced by *MJD-78Q* expression. Dendrites of ddaC class IV da neurons were analyzed with the NeuroLucida program.

**Live Time-Lapse Imaging of Dendrite Dynamics.** Live time-lapse imaging (Fig. S3) was carried out using a Leica SP5 confocal system. Images of dendrites of ddaC class IV da neurons in abdominal segments A2–A6 were taken, and the images of the same region were retaken after 30 min to determine dynamic changes. Early third instar larvae (96 h AEL) were examined.

**Statistical Analysis.** Student's unpaired *t* test (Microsoft Office Excel's TTEST) and Fisher's exact test ([www.graphpad.com/quickcalcs/index.cfm](http://www.graphpad.com/quickcalcs/index.cfm)) were used for statistical comparison.

**Genetic Interaction Study.** Only *MJD-78Q<sup>weak</sup>* transgene was used for genetic interaction study, because expressing other pathogenic polyQ transgenes could reduce the expression level of coexpressed transgenes. Dendrite phenotypes were examined in more than five animals of the same genotype.

1. Rumpf S, Lee SB, Jan LY, Jan YN (2011) Neuronal remodeling and apoptosis require VCP-dependent degradation of the apoptosis inhibitor DIAP1. *Development* 138: 1153–1160.

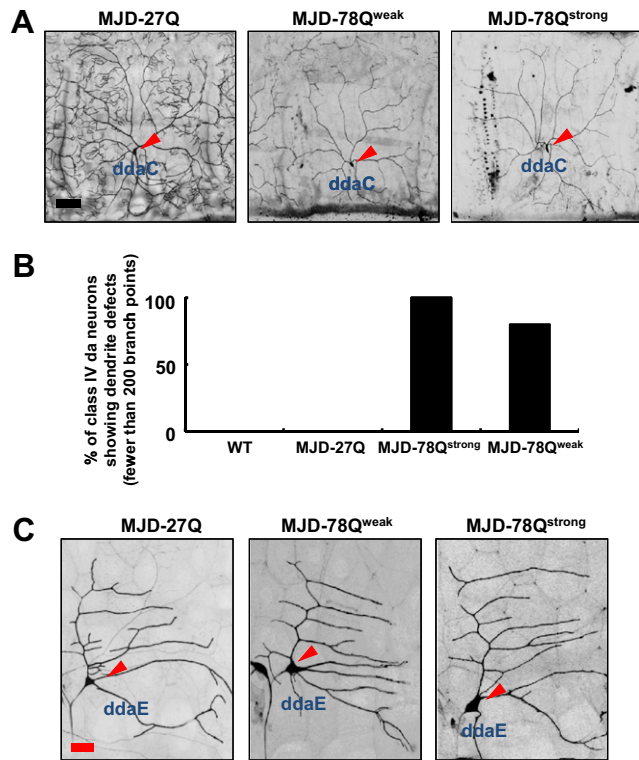

**Fig. S1.** Dendrite defects in class IV but not class I da neurons caused by weakly or strongly expressed MJD-78Q. (A and C) Images of dendrites of class IV (A) or I (C) da neurons expressing the denoted transgenes. Red arrowheads indicate cell bodies. (Scale bars: A, 100  $\mu\text{m}$ ; C, 30  $\mu\text{m}$ .) (B) Quantitative analysis of the percent of class IV da neurons showing dendrite defects ( $n = 20$ ).

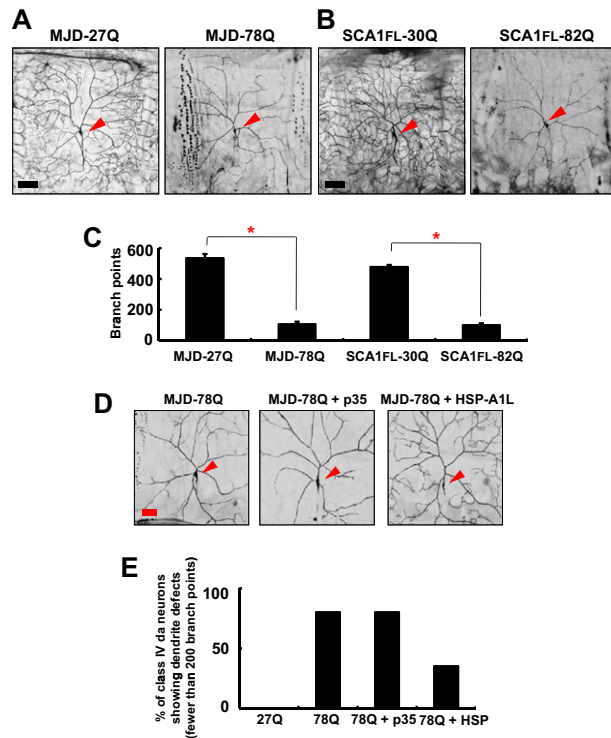

**Fig. S2.** PolyQ-induced dendrite defects were suppressed by chaperone proteins (HSP-A1L) but not p35. (A, B, and D) Images of dendrites of class IV da neurons expressing the denoted transgenes. Red arrowheads indicate cell bodies. (Scale bars: A and B, 100  $\mu\text{m}$ ; D, 50  $\mu\text{m}$ .) (C) Quantitative analysis of the number of total dendrite branch points in ddaC class IV da neurons expressing the denoted transgenes. Bars indicate mean  $\pm$  SD ( $n = 3$ ).  $*P < 0.01$  (Student's unpaired *t* test) relative to MJD-27Q or SCA1FL-30Q control. (E) Quantitative analysis of the percentage of class IV da neurons showing dendrite defects ( $n = 20$ ).
